# Supplementary material for: Differences of characteristic aroma compounds in Rougui tea leaves with different roasting temperatures analyzed by switchable GC-O-MS and GC × GC-O-MS and sensory evaluation
Source: Royal Society of Chemistry journal article supplement (doi:10.1039/d1fo00165e), 2021-01-01
Supplement: d1fo00165e1.pdf [file d1fo00165e1.pdf]

Table. Total aroma-active compounds identified in three samples and their relative concentration, threshold and r-OAV.

| Aroma Compounds <sup>a</sup>                                    | RI <sup>b</sup> | NIST<br>RI <sup>c</sup> | Relative Concentration(µg/kg) |      |       |      |       |      | Perception <sup>d</sup> | Identificati<br>on <sup>e</sup> | Threshold (wat<br>er, mg/kg) <sup>f</sup> | r-OAV |      |      |
|-----------------------------------------------------------------|-----------------|-------------------------|-------------------------------|------|-------|------|-------|------|-------------------------|---------------------------------|-------------------------------------------|-------|------|------|
|                                                                 |                 |                         | LF                            |      | MF    |      | HF    |      |                         |                                 |                                           | LF    | MF   | HF   |
|                                                                 |                 |                         | AVE                           | SD   | AVE   | SD   | AVE   | SD   |                         |                                 |                                           |       |      |      |
| 3,7,11-trimethyl-1,6,10-dodecatrien-3-ol                        | 201             | 2034-P                  | 986.9                         | 68.5 | 929.1 | 70.0 | 770.3 | 39.7 | floral                  | 1D/2D/S                         | 0.01-0.1                                  | 99    | 93   | 77   |
|                                                                 | 3               |                         | 3                             | 6    | 1     | 2    | 8     | 6    |                         |                                 |                                           |       |      |      |
| 3,7-dimethyl-1,5,7-octatrien-3-ol                               | 158             | 1613-P                  | 748.4                         | 26.6 | 432.6 | 18.6 | 217.5 | 10.8 | mouldy                  | 1D/2D/S                         | -                                         | -     | -    | -    |
|                                                                 | 0               |                         | 6                             | 2    | 9     | 7    | 9     | 6    |                         |                                 |                                           |       |      |      |
| benzaldehyde                                                    | 149             | 1520-P                  | 434.4                         | 13.8 | 462.4 | 22.1 | 495.1 | 18.6 | almond                  | 1D/2D/S                         | 0.35                                      | 1     | 1    | 1    |
|                                                                 | 9               |                         | 1                             | 8    | 4     | 4    | 8     | 7    |                         |                                 |                                           |       |      |      |
| <i>(E,E)</i> -2,4-heptadienal                                   | 146             | 1495-P                  | 391.2                         | 83.5 | 338.8 | 14.8 | 48.92 | 9.65 | fatty                   | 1D/2D/S                         | 0.057 (in air)                            | 7     | 6    | 1    |
|                                                                 | 8               |                         | 7                             | 7    | 3     | 5    |       |      |                         |                                 |                                           |       |      |      |
| hexanoic acid ( <i>Z</i> )-3-hexenyl ester                      | 163             | 1645-P                  | 330.6                         |      | 303.8 |      | 407.8 | 68.4 | fruity                  | 1D/2D                           | -                                         | -     | -    | -    |
|                                                                 | 4               |                         | 9                             | 7.63 | 8     | 1.55 | 8     | 9    |                         |                                 |                                           |       |      |      |
| <i>(E,E)</i> -3,5-octadien-2-one                                | 154             | 1570-P                  | 321.8                         |      | 157.3 |      | 18.71 | 1.54 | fruity green            | 1D/2D                           | -                                         | -     | -    | -    |
|                                                                 | 5               |                         | 0                             | 8.12 | 9     | 1.17 |       |      |                         |                                 |                                           |       |      |      |
| linalool                                                        | 151             | 1547-P                  | 320.3                         | 31.5 | 290.7 | 17.5 | 167.1 | 12.7 | floral woody            | 1D/2D/S                         | 0.0006                                    | 534   | 485  | 279  |
|                                                                 | 8               |                         | 7                             | 0    | 6     | 5    | 2     | 8    |                         |                                 |                                           |       |      |      |
| <i>(E)</i> -β-ionone                                            | 191             | 1940-P                  | 270.0                         | 12.5 | 226.2 | 13.2 | 214.0 |      | floral woody            | 1D/2D/S                         | 0.000007                                  | 3857  | 3231 | 3058 |
|                                                                 | 2               |                         | 3                             | 8    | 3     | 1    | 8     | 9.79 |                         |                                 |                                           |       |      |      |
| indole                                                          | 240             | 2445-P                  | 263.5                         |      | 181.8 | 13.2 |       |      | floral fecal            | 1D/2D/S                         | 0.33 (in alcohol)                         | 1     | 1    | -    |
|                                                                 | 2               |                         | 2                             | 8.04 | 7     | 4    | 92.68 | 4.46 |                         |                                 |                                           |       |      |      |
| <i>cis</i> -5-ethenyltetrahydro-α,α,5-trimethyl-2-furanmethanol | 142             | 1444-P                  | 230.6                         | 23.2 | 345.2 | 21.7 | 398.2 | 34.0 | earthy floral           | 1D/2D/S                         | 0.1                                       | 2     | 3    | 4    |
|                                                                 | 2               |                         | 8                             | 3    | 2     | 5    | 5     | 2    |                         |                                 |                                           |       |      |      |
| 2,6,6-trimethyl-1-cyclohexene-1-carboxaldehyde                  | 159             | 1611-P                  | 219.1                         |      | 229.1 |      | 283.0 | 48.2 | tobacco fruity          | 1D/2D                           | 0.003                                     | 73    | 76   | 94   |
|                                                                 | 9               |                         | 6                             | 5.30 | 2     | 6.55 | 6     | 6    |                         |                                 |                                           |       |      |      |
| furfural                                                        | 143             | 1461-P                  | 214.2                         | 35.1 | 494.6 | 26.6 | 738.5 |      | sweet bread             | 1D/2D/S                         | 3                                         | -     | -    | -    |
|                                                                 | 7               |                         | 4                             | 4    | 6     | 6    | 7     | 7.32 |                         |                                 |                                           |       |      |      |
| α-ionone                                                        | 182             | 1840-P                  | 202.6                         | 10.3 | 195.4 |      | 181.5 |      | sweet woody<br>floral   | 1D/2D/S                         | 0.0106                                    | 19    | 18   | 17   |
|                                                                 | 7               |                         | 6                             | 2    | 4     | 8.68 | 1     | 0.96 |                         |                                 |                                           |       |      |      |
| benzeneacetaldehyde                                             | 161             | 1640-P                  | 185.3                         |      | 195.8 |      | 185.9 | 13.7 | floral honey            | 2D/S                            | 0.0063                                    | 29    | 31   | 30   |
|                                                                 | 3               |                         | 2                             | 8.25 | 8     | 8.09 | 1     | 8    |                         |                                 |                                           |       |      |      |
| hexanal                                                         | 105             | 1083-P                  | 176.8                         | 2.99 | 79.80 | 2.07 | 35.80 | 4.23 | grassy                  | 1D/2D/S                         | 0.0024                                    | 74    | 33   | 15   |

|                                   |     |        |       |      |       |      |       |      |                    |         |            |    |    |     |  |
|-----------------------------------|-----|--------|-------|------|-------|------|-------|------|--------------------|---------|------------|----|----|-----|--|
|                                   | 9   |        | 6     |      |       |      |       |      |                    |         |            |    |    |     |  |
| (E)- $\beta$ -farnesene           | 164 | 1664-P | 175.2 | 13.6 | 156.7 | 3.64 | 149.8 | 25.5 | woody herbal       | 1D/2D   | -          | -  | -  | -   |  |
|                                   | 5   |        | 8     | 5    | 8     |      | 5     | 8    | sweet              |         |            |    |    |     |  |
| (E)-hexanoic acid 2-hexenyl ester | 164 | 1662-P | 160.8 | 7.28 | 137.8 | 1.73 | 219.6 | 58.4 | green waxy         | 1D/2D   | 0.781-3.13 | -  | -  | -   |  |
|                                   | 5   |        | 4     |      | 2     |      | 4     | 0    |                    |         |            |    |    |     |  |
| geraniol                          | 181 | 1847-P | 153.8 | 3.13 | 124.5 | 0.47 | 53.64 | 2.24 | sweet floral       | 1D/2D/S | 0.0032     | 48 | 39 | 17  |  |
|                                   | 4   |        | 0     |      | 6     |      |       |      | citrus             |         |            |    |    |     |  |
| phenylethyl alcohol               | 188 | 1906-P | 146.7 | 7.79 | 150.5 | 17.1 | 136.6 | 14.3 | floral             | 1D/2D/S | 0.14       | 1  | 1  | 1   |  |
|                                   | 0   |        | 1     |      | 7     | 8    | 5     | 6    |                    |         |            |    |    |     |  |
| nonanal                           | 137 | 1391-P | 112.4 | 3.00 | 90.94 | 1.57 | 60.30 | 13.0 | waxy fatty         | 1D/2D/S | 0.0058     | 19 | 16 | 10  |  |
|                                   | 0   |        | 5     |      |       |      |       | 9    |                    |         |            |    |    |     |  |
| (E)-2-octenal                     | 140 | 1429-P | 90.59 | 1.00 | 82.18 | 0.75 | 28.40 | 3.27 | cucumber green     | 1D/2D/S | 0.003      | 30 | 27 | 9   |  |
|                                   | 7   |        |       |      |       |      |       |      | leaf               |         |            |    |    |     |  |
| 1-octanol                         | 153 | 1557-P | 85.08 | 7.21 | 65.11 | 1.20 | 73.87 | 8.86 | waxy               | 1D/2D/S | 0.1258     | 1  | 1  | 1   |  |
|                                   | 1   |        |       |      |       |      |       |      |                    |         |            |    |    |     |  |
| 5-methyl-2-furancarboxaldehyde    | 154 | 1570-P | 77.38 | 5.95 | 292.8 | 14.9 | 591.4 | 17.4 | spice caramel      | 1D/2D/S | 0.5        | -  | 1  | 1   |  |
|                                   | 5   |        |       |      | 3     | 9    | 8     | 8    |                    |         |            |    |    |     |  |
| D-limonene                        | 117 | 1201-P | 68.20 | 11.3 | 141.5 | 29.9 | 357.7 | 99.1 | citrus             | 1D/2D/S | 0.034      | 2  | 4  | 11  |  |
|                                   | 5   |        |       | 3    | 4     | 8    | 0     | 9    |                    |         |            |    |    |     |  |
| acetic acid 2-phenylethyl ester   | 178 | 1813-P | 61.82 | 2.18 | 77.44 | 5.48 | 125.9 | 11.6 | floral honey       | 1D/2D   | 0.25       | -  | -  | 1   |  |
|                                   | 7   |        |       |      |       |      | 0     | 3    | fruity             |         |            |    |    |     |  |
| $\beta$ -phenylethyl butyrate     | 193 | 1958-P | 58.35 | 1.61 | 59.76 | 5.10 | 83.98 | 12.4 | musty sweet        | 1D/2D   | -          | -  | -  | -   |  |
|                                   | 4   |        |       |      |       |      |       | 2    | floral             |         |            |    |    |     |  |
| benzylalcohol                     | 184 | 1870-P | 50.27 | 2.14 | 58.35 | 5.82 | 50.17 | 5.50 | floral rose        | 1D/2D/S | 2.5        | -  | -  | -   |  |
|                                   | 5   |        |       |      |       |      |       |      |                    |         |            |    |    |     |  |
| acetophenone                      | 162 | 1647-P | 48.29 | 2.78 | 84.41 | 1.65 | 143.1 | 12.0 | sweet pungent      | 1D/2D/S | 0.065      | 1  | 1  | 2   |  |
|                                   | 5   |        |       |      |       |      | 6     | 6    |                    |         |            |    |    |     |  |
| (E)-2-pentenal                    | 110 | 1127-P | 44.95 | 1.48 | 32.59 | 9.79 | 5.98  | 0.18 | pungent fruity     | 1D/2D/S | 0.31       | -  | -  | -   |  |
|                                   | 8   |        |       |      |       |      |       |      |                    |         |            |    |    |     |  |
| 2-methylbutanal                   | 895 | 914-P  | 41.84 | 6.67 | 50.58 | 1.76 | 31.85 | 3.75 | cocoa coffee       | 1D/2D/S | 0.001      | 42 | 51 | 32  |  |
|                                   |     |        |       |      |       |      |       |      |                    |         |            |    |    |     |  |
| $\beta$ -myrcene                  | 113 | 1161-P | 39.69 | 4.04 | 68.01 | 14.6 | 184.9 | 10.0 | woody,             | 1D/2D/S | 0.0012     | 33 | 57 | 154 |  |
|                                   | 8   |        |       |      |       | 5    | 5     | 9    | vegetative, citrus |         |            |    |    |     |  |
| 3-octen-2-one                     | 138 | 1411-P | 38.32 | 2.69 | -     | -    | -     | -    | sweet blueberry    | 1D/2D   | 0.0067     | 6  | -  | -   |  |

|                                                              |          |        |       |      |       |           |            |           |                                  |         |                      |     |     |     |  |
|--------------------------------------------------------------|----------|--------|-------|------|-------|-----------|------------|-----------|----------------------------------|---------|----------------------|-----|-----|-----|--|
|                                                              | 5        |        |       |      |       |           |            |           |                                  |         |                      |     |     |     |  |
| (E)-2-nonenal                                                | 151<br>3 | 1534-P | 34.79 | 1.98 | 46.46 | 0.23      | 61.91      | 12.1<br>2 | fatty cucumber                   | 1D/2D/S | 0.00019              | 183 | 245 | 326 |  |
| (R)-5,6,7,7a-tetrahydro-4,4,7a-trimethyl-2(4H)-benzofuranone | 231<br>8 | 2331-P | 34.26 | 9.07 | 31.51 | 4.50      | 34.03      | 1.70      | musk coumarin                    | 1D/2D   | -                    | -   | -   | -   |  |
| (E,Z)-2,6-nonadienal                                         | 156<br>1 | 1584-P | 33.89 | 0.48 | 26.87 | 5.07      | 25.41      | 1.58      | fatty                            | 1D/2D/S | 0.0008               | 42  | 34  | 32  |  |
| octanal                                                      | 126<br>7 | 1289-P | 33.40 | 0.58 | 13.38 | 0.95      | -          | -         | waxy fatty                       | 1D/2D/S | 0.000587             | 57  | 23  | -   |  |
| 3-nonen-2-one                                                | 148<br>9 | 1515-P | 31.07 | 1.36 | 26.45 | 2.40      | 15.60      | 0.91      | weedy spicy                      | 1D/2D   | 0.8                  | -   | -   | -   |  |
| 2-pentylfuran                                                | 120<br>6 | 1231-P | 29.19 | 6.42 | 51.15 | 9.73      | 108.6<br>8 | 32.0<br>8 | green earthy<br>beany            | 1D/2D/S | 0.0058               | 5   | 9   | 19  |  |
| 1-(1H-pyrrol-2-yl)-ethanone                                  | 193<br>7 | 1973   | 28.44 | 3.51 | 47.06 | 6.60      | 51.40      | 7.33      | musty nut                        | 1D/2D   | 58.58                | -   | -   | -   |  |
| pentanal                                                     | 956      | 979-P  | 26.08 | 1.85 | 16.75 | 1.38      | -          | -         | fermented                        | 1D/2D/S | 0.012                | 2   | 1   | -   |  |
| (Z)-4-heptenal                                               | 121<br>8 | 1240-P | 25.17 | 1.02 | 25.77 | 1.90      | -          | -         | fatty green                      | 2D/S    | 0.00006              | 419 | 430 | -   |  |
| p-cymene                                                     | 124<br>8 | 1272-P | 24.18 | 2.87 | 70.56 | 18.4<br>3 | 212.9<br>0 | 71.8<br>4 | fresh woody                      | 1D/2D   | 0.00501              | 5   | 14  | 42  |  |
| (E,E)-2,4-hexadienal                                         | 137<br>7 | 1400-P | 22.44 | 0.79 | 15.03 | 0.26      | 8.28       | 0.91      | green spicy                      | 1D/2D/S | 0.0018 (in<br>air)   | 12  | 8   | 5   |  |
| butanoicacid 2-methyl-hexyl ester                            | 141<br>0 | 1433-P | 21.40 | 0.83 | 17.12 | 2.21      | 34.29      | 9.45      | fruity apple                     | 1D/2D   | 0.086-0.43           | -   | -   | -   |  |
| 1-pentanol                                                   | 122<br>9 | 1250-P | 20.79 | 4.50 | 22.72 | 1.01      | 22.54      | 2.37      | oil                              | 1D/2D/S | 0.1502               | -   | -   | -   |  |
| 1-(2-furanylmethyl)-1H-pyrrole                               | 179<br>6 | 1824-P | 20.78 | 1.65 | 91.28 | 1.41      | 147.4<br>9 | 16.2<br>4 | plastic waxy<br>coffee vegetable | 1D/2D/S | 0.1                  | -   | 1   | 1   |  |
| $\alpha$ -phellandrene                                       | 113<br>8 | 1167-P | 20.23 | 2.55 | 18.52 | 4.31      | 36.72      | 11.5<br>1 | herbal green<br>woody            | 2D      | 0.04                 | 1   | -   | 1   |  |
| 3-methylbutanal                                              | 899      | 918-P  | 19.29 | 3.43 | 24.99 | 1.53      | 16.53      | 1.80      | chocolate                        | 1D/2D/S | 0.00035-0.0004       | 55  | 71  | 47  |  |
| 2-ethylfuran                                                 | 934      | 950-P  | 19.23 | 1.42 | 26.08 | 1.67      | 26.87      | 2.84      | earthy                           | 1D/2D   | 8(in coconut<br>oil) | -   | -   | -   |  |

|                                                     |          |        |       |           |            |           |            |           |                               |         |        |    |    |    |
|-----------------------------------------------------|----------|--------|-------|-----------|------------|-----------|------------|-----------|-------------------------------|---------|--------|----|----|----|
| acetic acid methyl ester                            | 808      | 828-P  | 18.99 | 0.22      | 49.21      | 1.36      | 154.8<br>4 | 9.06      | fruity                        | 1D/2D   | 1.5-47 | -  | -  | -  |
| 1-(2-furanyl)ethanone                               | 147<br>8 | 1499-P | 15.61 | 13.5<br>4 | 74.37      | 9.64      | 90.80      | 3.77      | cocoa caramel<br>coffee       | 1D/2D/S | 15     | -  | -  | -  |
| 2-methylpropanal                                    | <80<br>0 | 819-P  | 15.26 | 0.97      | 19.62      | 0.79      | -          | -         | pungent, malty                | 1D/2D/S | 0.0015 | 10 | 13 | -  |
| (Z)-3-hexen-1-ol                                    | 136<br>0 | 1382-P | 12.63 | 2.29      | 15.42      | 0.30      | 24.36      | 2.20      | fresh green grass             | 2D      | 0.0039 | 3  | 4  | 6  |
| dihydro-5-pentyl-2(3H)-furanone                     | 199<br>9 | 2024-P | 11.95 | 0.93      | 15.39      | 1.52      | 15.36      | 0.98      | coconut creamy                | 2D      | 0.0097 | 1  | 2  | 2  |
| tetrahydro-6-pentyl-2H-pyran-2-one                  | 216<br>4 | 2194-P | 9.28  | 1.43      | 13.12      | 2.75      | 11.02      | 0.12      | fresh sweet                   | 1D/2D   | 0.066  | -  | -  | -  |
| 1-penten-3-one                                      | 999      | 1019-P | 8.56  | 0.17      | 11.14      | 0.82      | -          | -         | mustard                       | 1D/2D   | 0.023  | -  | -  | -  |
| $\beta$ -phellandrene                               | 118<br>4 | 1211-P | 8.17  | 0.97      | 10.18      | 2.18      | 21.02      | 7.22      | mint terpentine               | 1D/2D   | 0.036  | -  | -  | 1  |
| (E,E)-2,6-dimethyl-2,4,6-octatriene                 | 135<br>1 | 1379-P | 6.83  | 0.60      | 12.35      | 1.70      | -          | -         | terpene sweet<br>fresh floral | 1D/2D   | -      | -  | -  | -  |
| 2-methylbutanenitrile                               | 106<br>3 | 1091-P | 5.80  | 1.37      | 8.42       | 0.41      | 13.47      | 2.54      | gasoline                      | 1D/2D   | -      | -  | -  | -  |
| 2,3-pentanedione                                    | 103<br>5 | 1058-P | 2.65  | 0.15      | 8.27       | 0.51      | 9.37       | 0.74      | toasted                       | 1D/2D   | 0.02   | -  | -  | -  |
| methyl jasmonate                                    | 229<br>5 | 2338-P | 2.60  | 0.61      | 2.60       | 0.58      | 2.72       | 0.54      | floral fresh                  | 2D      | 0.07   | -  | -  | -  |
| p-cresol                                            | 204<br>3 | 2080-P | 1.70  | 0.14      | 4.74       | 0.30      | 11.47      | 1.08      | floral                        | 2D      | 0.0039 | -  | 1  | 3  |
| 1-ethyl-1H-pyrrole-2-carboxaldehyde                 | 158<br>5 | 1610-p | -     | -         | 331.9<br>1 | 18.6<br>3 | 424.2<br>5 | 14.1<br>3 | burnt roasted<br>smoky        | 1D/2D   | -      | -  | -  | -  |
| methyl salicylate                                   | 175<br>0 | 1765-P | -     | -         | 270.9<br>4 | 1.99      | 566.5<br>6 | 42.8<br>6 | mint                          | 2D      | 0.04   | -  | 7  | 14 |
| hexanoic acid hexyl ester                           | 159<br>1 | 1602-P | -     | -         | 190.9<br>0 | 3.09      | 315.7<br>5 | 72.5<br>1 | fruity                        | 1D/2D   | 6.4    | -  | -  | -  |
| 2,6,6-trimethyl-1,3-cyclohexadiene-1-carboxaldehyde | 162<br>5 | 1616-P | -     | -         | 147.6<br>7 | 3.65      | 193.1<br>8 | 29.3<br>7 | fresh herbal                  | 1D/2D   | -      | -  | -  | -  |

|                                                                |          |        |   |   |            |           |            |      |                               |         |                |   |    |    |
|----------------------------------------------------------------|----------|--------|---|---|------------|-----------|------------|------|-------------------------------|---------|----------------|---|----|----|
| (2-nitroethyl)-benzene                                         | 208<br>5 | 2064-P | - | - | 109.9<br>2 | 3.24      | 98.06      | 5.69 | flower spice                  | 1D/2D/S | 0.002          | - | 55 | 49 |
| 2,5-dimethyl-3-ethylpyrazine                                   | 142<br>7 | 1443-P | - | - | 88.94      | 6.04      | 151.7<br>3 | 9.05 | potato cocoa<br>roasted nutty | 2D/S    | 0.0086         | - | 10 | 18 |
| 6-methyl-3,5-heptadiene-2-one                                  | 156<br>7 | 1602-P | - | - | 80.98      | 1.70      | 69.34      | 8.27 | cinnamon spice<br>woody weedy | 1D/2D   | -              | - | -  | -  |
| 4-(2,2,6-trimethyl-7-oxabicyclo[4.1.0]hept-1-yl)-3-buten-2-one | 196<br>7 | 1962-P | - | - | 52.27      | 2.99      | 34.31      | 0.90 | fruity sweet<br>berry woody   | 1D/2D   | -              | - | -  | -  |
| 6-methyl-2-ethylpyrazine                                       | 136<br>5 | 1386-p | - | - | 50.94      | 16.5<br>2 | 15.37      | 4.23 | roasted potato                | 1D/2D   | 0.04           | - | 1  | -  |
| 4-methyl-3-penten-2-one                                        | 111<br>3 | 1127-P | - | - | 42.64      | 1.19      | 32.84      | 4.84 | pungent earthy<br>vegetable   | 1D/2D   | 0.20 (in air)  | - | -  | -  |
| 3-methyl-2-ethylpyrazine                                       | 138<br>5 | 1407-P | - | - | 39.55      | 2.04      | 35.89      | 5.05 | peanut musty                  | 2D      | 0.5            | - | -  | -  |
| citral                                                         | 170<br>5 | 1718-P | - | - | 30.33      | 3.64      | 25.58      | 5.85 | lemon                         | 2D      | 0.032          | - | 1  | 1  |
| 4-ethylbenzaldehyde                                            | 168<br>2 | 1721-P | - | - | 29.61      | 5.08      | 58.13      | 3.37 | almond                        | 1D/2D   | 0.04           | - | 1  | 1  |
| butanoic acid hexyl ester                                      | 139<br>5 | 1414-P | - | - | 26.70      | 3.85      | -          | -    | green fruity                  | 1D/2D   | 0.203          | - | -  | -  |
| 2,4-decadienal                                                 | 173<br>8 | 1797-P | - | - | 13.37      | 0.10      | -          | -    | fatty                         | 2D      | 0.0003         | - | 45 | -  |
| 1H-pyrrole-2-carboxaldehyde                                    | 198<br>9 | 2030-P | - | - | 10.65      | 2.02      | 20.89      | 4.12 | musty beefy<br>coffee         | 1D/2D   | 65             | - | -  | -  |
| 1-methyl-1H-pyrrole-2-carboxaldehyde                           | 159<br>3 | 1626-p | - | - | 10.32      | 0.76      | 29.58      | 0.52 | roasted nutty                 | 2D      | 0.037          | - | -  | 1  |
| trans-Isoeugenol                                               | 230<br>2 | 2354-P | - | - | 9.41       | 1.21      | -          | -    | sweet spicy<br>floral         | 1D/2D   | 0.978 (in oil) | - | -  | -  |
| 5-butylidihydro-2(3H)-furanone                                 | 188<br>9 | 1910-P | - | - | 8.65       | 0.89      | 12.03      | 2.81 | coconut                       | 2D/S    | 0.012          | - | 1  | 1  |
| 1-propen-2-ol,acetate                                          | <80<br>0 | -      | - | - | 2.40       | 0.10      | 18.22      | 2.56 | grape                         | 2D      | -              | - | -  | -  |
| dimethyl disulfide                                             | 105      | 1077-P | - | - | 1.38       | 0.70      | 5.84       | 0.51 | cabbage                       | 1D/2D/S | 0.09           | - | -  | -  |

|                                           |          |        |   |   |   |   |            |           |                    |         |               |   |   |   |  |
|-------------------------------------------|----------|--------|---|---|---|---|------------|-----------|--------------------|---------|---------------|---|---|---|--|
|                                           | 2        |        |   |   |   |   |            |           |                    |         |               |   |   |   |  |
| (E)-2-methyl-2-butenal                    | 107<br>1 | 1092-P | - | - | - | - | 9.24       | 1.37      | strong green fruit | 1D/2D   | 0.4589        | - | - | - |  |
| 4,5-dimethyl-2-isobutyloxazole            | 132<br>9 | 1330-P | - | - | - | - | 26.16      | 6.53      | burnt roasted      | 2D      | -             | - | - | - |  |
| 5-methyl-2-ethylpyrazine                  | 137<br>2 | 1387-P | - | - | - | - | 64.34      | 19.5<br>1 | coffee bean nutty  | 2D      | 0.016         | - | - | 4 |  |
| 2-nonanone                                | 136<br>8 | 1390-P | - | - | - | - | 35.77      | 0.77      | green weedy        | 1D/2D/S | 0.041-0.082   | - | - | 1 |  |
| 2-nonen-4-one                             | 145<br>8 | 1468-P | - | - | - | - | 15.22      | 7.23      | 0                  | 2D      | 0.02 (in air) | - | - | 1 |  |
| cyclopentanol                             | 956      | 1299-P | - | - | - | - | 17.79      | 2.52      | 0                  | 2D      | 0.1251        | - | - | - |  |
| 5-methyl-2-(1-methylethenyl)-4-hexen-1-ol | 107<br>1 | -      | - | - | - | - | 63.09      | 12.5<br>3 | floral             | 2D      | -             | - | - | - |  |
| trans-linalooloxide(furanoid)             | 145<br>0 | 1452-P | - | - | - | - | 173.7<br>3 | 8.25      | floral             | 1D/2D   | 0.06          | - | - | 3 |  |
| (Z)-3,7-dimethyl-1,3,6-octatriene         | 122<br>7 | 1235-P | - | - | - | - | 169.2<br>1 | 11.1<br>1 | floral herb        | 1D/2D   | 0.034         | - | - | 5 |  |
| 1-octen-3-one                             | 132<br>2 | 1300-P | - | - | - | - | -          | -         | mushroom           | 1D/2D/S | -             | - | - | - |  |
| unknown                                   | 109<br>8 |        | - | - | - | - | -          | -         | <b>garlic</b>      | 1D/2D   | -             | - | - | - |  |
| unknown                                   | 122<br>1 |        | - | - | - | - | -          | -         | <b>popcorn</b>     | 1D      | -             | - | - | - |  |
| unknown                                   | 134<br>1 |        | - | - | - | - | -          | -         | <b>popcorn</b>     | 1D/2D   | -             | - | - | - |  |
| unknown                                   | 200<br>6 | □      | - | - | - | - | -          | -         | <b>roasty</b>      | 1D      | -             | - | - | - |  |

<sup>a</sup> Totally aroma-active compounds were identified as the aroma-active compounds.

<sup>b</sup> The RI values that calculated on DB-WAX column in 2D mode; "P" represent for polar column.

<sup>c</sup> The NIST RI values were referred from the NIST 14 library.

<sup>d</sup> The aroma depiction of each compound was obtained at the sniffer port.

<sup>e</sup> The identified mode of each compounds. "S" represented the verification by authentic reference standards.

<sup>f</sup> The thresholds listed in the table were referred the book: Gemert L.J.v, Compilations of odour threshold values in air, water & other media and compilations of flavour threshold values in water & other media, 2011 1st ed. Oliemans Punter & Partners BV, Netherlands (2003).
